# Supplementary material for: Solvent-mediated crystallization of (TMS)2BiBr5·DMSO: a new 0D hybrid halide perovskite
Source: Royal Society of Chemistry journal article supplement (doi:10.1039/d2dt03803j), 2023-01-01
Supplement: d2dt03803j1.pdf [file d2dt03803j1.pdf]

## Supporting Information

# **Solvent Mediated Crystallization of $(\text{TMS})_2\text{BiBr}_5 \cdot \text{DMSO}$ : A New 0D hybrid Perovskite**

Suman S. Das, Abinash Pradhan, and Saroj L Samal\*

Solid State and Materials Laboratory, Department of Chemistry, National Institute of  
Technology, Rourkela-769008, INDIA

**Table S1:** Atomic Parameters along with the site occupancy factor (SOF) of  $(\text{TMS})_2\text{BiBr}_5\cdot\text{DMSO}$ .

| Atom | Wyck. | Site | S.O.F. | x/a          | y/b         | z/c         | U [ $\text{\AA}^2$ ] |
|------|-------|------|--------|--------------|-------------|-------------|----------------------|
| Bi1  | 2i    | 1    |        | 0.26337(4)   | 0.75242(3)  | 0.25020(2)  |                      |
| Br1  | 2i    | 1    |        | 0.05869(13)  | 0.54385(10) | 0.21545(7)  |                      |
| Br2  | 2i    | 1    |        | 0.27306(14)  | 0.66045(11) | 0.43038(6)  |                      |
| Br3  | 2i    | 1    |        | 0.46728(13)  | 0.96211(11) | 0.28638(7)  |                      |
| Br4  | 2i    | 1    |        | 0.29271(13)  | 0.80027(11) | 0.06567(6)  |                      |
| Br5  | 2i    | 1    |        | -0.00955(12) | 0.97385(10) | 0.27263(7)  |                      |
| S1   | 2i    | 1    |        | 0.5171(3)    | 0.3878(3)   | 0.25038(18) |                      |
| S2   | 2i    | 1    |        | -0.2923(3)   | 0.7873(3)   | 0.51589(17) |                      |
| S3   | 2i    | 1    | 0.278  | 0.8551(13)   | 0.7210(11)  | -0.0039(7)  |                      |
| S4   | 2i    | 1    | 0.722  | 0.7156(4)    | 0.7921(4)   | -0.0121(2)  |                      |
| O1   | 2i    | 1    |        | 0.5131(8)    | 0.5486(7)   | 0.2272(5)   |                      |
| C1   | 2i    | 1    |        | 0.6562(19)   | 0.3436(13)  | 0.3334(8)   |                      |
| C2   | 2i    | 1    |        | 0.647(2)     | 0.2901(14)  | 0.1682(8)   |                      |
| C3   | 2i    | 1    |        | -0.2401(17)  | 0.9575(11)  | 0.4854(7)   |                      |
| C4   | 2i    | 1    |        | -0.1434(15)  | 0.7238(12)  | 0.5939(7)   |                      |
| C5   | 2i    | 1    |        | -0.2235(14)  | 0.6789(10)  | 0.4233(6)   |                      |
| C6   | 2i    | 1    | 0.278  | 0.738(6)     | 0.807(4)    | -0.091(2)   |                      |
| C7   | 2i    | 1    | 0.722  | 0.9077(19)   | 0.7900(16)  | -0.0710(11) |                      |
| C8   | 2i    | 1    | 0.722  | 0.736(5)     | 0.607(2)    | 0.0201(18)  |                      |
| C9   | 2i    | 1    | 0.278  | 0.748(10)    | 0.574(6)    | 0.023(4)    |                      |
| C10  | 2i    | 1    | 0.722  | 0.747(4)     | 0.879(3)    | 0.0871(12)  |                      |
| C11  | 2i    | 1    | 0.278  | 0.782(10)    | 0.845(6)    | 0.083(3)    |                      |
| H1A  | 2i    | 1    |        | 0.76046      | 0.36794     | 0.31516     | 0.1650               |
| H1B  | 2i    | 1    |        | 0.67119      | 0.23966     | 0.34630     | 0.1650               |
| H1C  | 2i    | 1    |        | 0.61441      | 0.39845     | 0.38511     | 0.1650               |
| H2A  | 2i    | 1    |        | 0.59968      | 0.31398     | 0.11179     | 0.1680               |
| H2B  | 2i    | 1    |        | 0.65885      | 0.18587     | 0.17917     | 0.1680               |
| H2C  | 2i    | 1    |        | 0.75408      | 0.31729     | 0.16892     | 0.1680               |
| H3A  | 2i    | 1    |        | -0.12379     | 0.94326     | 0.47107     | 0.1290               |
| H3B  | 2i    | 1    |        | -0.26616     | 1.02524     | 0.53340     | 0.1290               |
| H3C  | 2i    | 1    |        | -0.30189     | 0.99713     | 0.43518     | 0.1290               |

|      |    |   |       |          |         |          |        |
|------|----|---|-------|----------|---------|----------|--------|
| H4A  | 2i | 1 |       | -0.15644 | 0.62781 | 0.61485  | 0.1190 |
| H4B  | 2i | 1 |       | -0.15716 | 0.79117 | 0.64221  | 0.1190 |
| H4C  | 2i | 1 |       | -0.03490 | 0.71749 | 0.56750  | 0.1190 |
| H5A  | 2i | 1 |       | -0.29145 | 0.71451 | 0.37447  | 0.0980 |
| H5B  | 2i | 1 |       | -0.23077 | 0.57797 | 0.43579  | 0.0980 |
| H5C  | 2i | 1 |       | -0.11057 | 0.68510 | 0.40903  | 0.0980 |
| H6A  | 2i | 1 | 0.278 | 0.76600  | 0.74973 | -0.14334 | 0.1310 |
| H6B  | 2i | 1 | 0.278 | 0.62205  | 0.81405 | -0.07674 | 0.1310 |
| H6C  | 2i | 1 | 0.278 | 0.76079  | 0.90427 | -0.10065 | 0.1310 |
| H7A  | 2i | 1 | 0.722 | 0.91175  | 0.88771 | -0.09261 | 0.1190 |
| H7B  | 2i | 1 | 0.722 | 0.99795  | 0.75770 | -0.03252 | 0.1190 |
| H7C  | 2i | 1 | 0.722 | 0.91643  | 0.72354 | -0.11963 | 0.1190 |
| H8A  | 2i | 1 | 0.722 | 0.72164  | 0.54834 | -0.02974 | 0.1180 |
| H8B  | 2i | 1 | 0.722 | 0.84486  | 0.57256 | 0.04265  | 0.1180 |
| H8C  | 2i | 1 | 0.722 | 0.65437  | 0.59719 | 0.06487  | 0.1180 |
| H9A  | 2i | 1 | 0.278 | 0.80104  | 0.51651 | 0.07077  | 0.0960 |
| H9B  | 2i | 1 | 0.278 | 0.63526  | 0.61419 | 0.03943  | 0.0960 |
| H9C  | 2i | 1 | 0.278 | 0.75069  | 0.51167 | -0.02746 | 0.0960 |
| H10A | 2i | 1 | 0.722 | 0.73778  | 0.98284 | 0.07692  | 0.1130 |
| H10B | 2i | 1 | 0.722 | 0.66433  | 0.86235 | 0.13025  | 0.1130 |
| H10C | 2i | 1 | 0.722 | 0.85482  | 0.83772 | 0.10804  | 0.1130 |
| H11A | 2i | 1 | 0.278 | 0.83725  | 0.81018 | 0.13570  | 0.0980 |
| H11B | 2i | 1 | 0.278 | 0.80336  | 0.94122 | 0.06775  | 0.0980 |
| H11C | 2i | 1 | 0.278 | 0.66461  | 0.85100 | 0.09166  | 0.0980 |

**Table S2:** Anisotropic displacement parameters, in  $\text{\AA}^2$  of  $(\text{TMS})_2\text{BiBr}_5 \cdot \text{DMSO}$ .

| Atom | $U_{11}$    | $U_{22}$    | $U_{33}$    | $U_{12}$     | $U_{13}$     | $U_{23}$     |
|------|-------------|-------------|-------------|--------------|--------------|--------------|
| Bi1  | 0.04400(19) | 0.03186(17) | 0.03148(17) | -0.00188(12) | -0.00060(12) | -0.00220(12) |
| Br1  | 0.0728(6)   | 0.0505(6)   | 0.0603(6)   | -0.0200(5)   | -0.0103(5)   | -0.0049(5)   |
| Br2  | 0.0914(7)   | 0.0590(6)   | 0.0347(5)   | -0.0205(5)   | -0.0070(5)   | 0.0053(4)    |
| Br3  | 0.0663(6)   | 0.0656(6)   | 0.0639(7)   | -0.0272(5)   | 0.0006(5)    | -0.0071(5)   |
| Br4  | 0.0800(7)   | 0.0651(6)   | 0.0332(5)   | -0.0060(5)   | 0.0024(4)    | -0.0003(4)   |
| Br5  | 0.0536(5)   | 0.0525(6)   | 0.0636(6)   | 0.0083(4)    | 0.0009(4)    | -0.0105(5)   |
| S1   | 0.0576(15)  | 0.0485(14)  | 0.0741(18)  | -0.0003(11)  | -0.0038(13)  | 0.0054(12)   |

|     |            |            |            |             |            |             |
|-----|------------|------------|------------|-------------|------------|-------------|
| S2  | 0.0592(15) | 0.0604(15) | 0.0566(15) | -0.0116(12) | 0.0024(12) | -0.0053(12) |
| S3  | 0.067(7)   | 0.066(7)   | 0.080(8)   | -0.003(5)   | -0.004(5)  | -0.018(5)   |
| S4  | 0.056(2)   | 0.048(2)   | 0.049(2)   | -0.0060(16) | 0.0029(15) | -0.0010(15) |
| O1  | 0.075(5)   | 0.045(4)   | 0.084(5)   | 0.004(3)    | 0.011(4)   | 0.018(3)    |
| C1  | 0.184(15)  | 0.081(8)   | 0.066(8)   | -0.016(9)   | -0.067(9)  | 0.016(6)    |
| C2  | 0.187(13)  | 0.079(8)   | 0.061(7)   | -0.003(8)   | 0.013(8)   | -0.017(6)   |
| C3  | 0.156(12)  | 0.046(6)   | 0.058(7)   | -0.026(7)   | 0.003(7)   | 0.000(5)    |
| C4  | 0.115(10)  | 0.072(7)   | 0.053(7)   | -0.021(7)   | -0.020(6)  | 0.005(5)    |
| C5  | 0.093(8)   | 0.052(6)   | 0.049(6)   | -0.007(5)   | -0.015(5)  | -0.006(5)   |
| C6  | 0.14(3)    | 0.05(2)    | 0.08(2)    | -0.03(2)    | -0.03(2)   | 0.011(17)   |
| C7  | 0.086(11)  | 0.061(9)   | 0.094(12)  | -0.029(8)   | 0.046(9)   | -0.020(8)   |
| C8  | 0.090(15)  | 0.037(12)  | 0.104(17)  | -0.001(10)  | 0.017(12)  | 0.012(10)   |
| C9  | 0.08(3)    | 0.014(17)  | 0.10(4)    | -0.02(2)    | 0.01(3)    | -0.007(15)  |
| C10 | 0.106(18)  | 0.073(15)  | 0.039(9)   | 0.007(13)   | -0.004(8)  | -0.002(8)   |
| C11 | 0.08(4)    | 0.03(2)    | 0.08(2)    | -0.01(2)    | 0.00(2)    | -0.020(19)  |

**Table S3:** Selected bond distances of (TMS)<sub>2</sub>BiBr<sub>5</sub>.DMSO.

| Atoms 1,2 | d 1,2 [Å]  | Atoms 1,2 | d 1,2 [Å] |
|-----------|------------|-----------|-----------|
| Bi1—Br1   | 2.8541(10) | S4—C10    | 1.766(16) |
| Bi1—Br2   | 2.8572(9)  | C1—H1A    | 0.9600    |
| Bi1—Br3   | 2.8624(10) | C1—H1B    | 0.9600    |
| Bi1—Br4   | 2.8465(9)  | C1—H1C    | 0.9600    |
| Bi1—Br5   | 2.7472(9)  | C2—H2A    | 0.9600    |
| Bi1—O1    | 2.525(6)   | C2—H2B    | 0.9600    |
| S1—O1     | 1.513(6)   | C2—H2C    | 0.9600    |
| S1—C1     | 1.724(10)  | C3—H3A    | 0.9600    |
| S1—C2     | 1.762(12)  | C3—H3B    | 0.9600    |
| S2—C3     | 1.757(10)  | C3—H3C    | 0.9600    |
| S2—C4     | 1.746(10)  | C4—H4A    | 0.9600    |
| S2—C5     | 1.755(10)  | C4—H4B    | 0.9600    |
| S3—C6     | 1.75(2)    | C4—H4C    | 0.9600    |
| S3—C9     | 1.79(2)    | C5—H5A    | 0.9600    |
| S3—C11    | 1.77(2)    | C5—H5B    | 0.9600    |
| S4—C7     | 1.791(14)  | C5—H5C    | 0.9600    |

|        |           |          |        |
|--------|-----------|----------|--------|
| S4—C8  | 1.749(19) | C6—H6A   | 0.9600 |
| C6—H6B | 0.9600    | C9—H9A   | 0.9600 |
| C6—H6C | 0.9600    | C9—H9B   | 0.9600 |
| C7—H7A | 0.9600    | C9—H9C   | 0.9600 |
| C7—H7B | 0.9600    | C10—H10A | 0.9600 |
| C7—H7C | 0.9600    | C10—H10B | 0.9600 |
| C8—H8A | 0.9600    | C10—H10C | 0.9600 |
| C8—H8B | 0.9600    | C11—H11A | 0.9600 |
| C8—H8C | 0.9600    | C11—H11B | 0.9600 |
|        |           | C11—H11C | 0.9600 |

**Table S4:** Selected bond angles of (TMS)<sub>2</sub>BiBr<sub>5</sub>.DMSO.

| Atoms 1,2,3 | Angle 1,2,3 [°] | Atoms 1,2,3 | Angle 1,2,3 [°] |
|-------------|-----------------|-------------|-----------------|
| Br1—Bi1—Br2 | 89.51(3)        | C6—S3—C9    | 101.(2)         |
| Br2—Bi1—Br3 | 90.12(3)        | C6—S3—C11   | 101.(2)         |
| Br3—Bi1—Br4 | 91.97(3)        | C11—S3—C9   | 101.(2)         |
| Br4—Bi1—Br5 | 94.27(3)        | C8—S4—C7    | 101.2(13)       |
| Br1—Bi1—Br5 | 91.17(3)        | C8—S4—C10   | 102.4(12)       |
| Br1—Bi1—Br3 | 179.54(3)       | C10—S4—C7   | 102.2(13)       |
| Br1—Bi1—Br4 | 88.43(3)        | H1A—C1—H1B  | 109.500         |
| Br4—Bi1—Br2 | 170.52(3)       | H1A—C1—H1C  | 109.500         |
| Br5—Bi1—Br2 | 95.03(3)        | H1B—C1—H1C  | 109.500         |
| Br5—Bi1—Br3 | 88.58(3)        | H2A—C2—H2B  | 109.500         |
| S1—O1—Bi1   | 124.3(4)        | H2A—C2—H2C  | 109.500         |
| O1—Bi1—Br1  | 88.46(16)       | H2B—C2—H2C  | 109.500         |
| O1—Bi1—Br2  | 85.76(16)       | H3A—C3—H3B  | 109.500         |
| O1—Bi1—Br3  | 91.80(16)       | H3A—C3—H3C  | 109.500         |
| O1—Bi1—Br4  | 84.93(16)       | H3B—C3—H3C  | 109.500         |
| O1—Bi1—Br5  | 179.12(16)      | H4A—C4—H4B  | 109.500         |
| O1—S1—C1    | 106.6(5)        | H4A—C4—H4C  | 109.500         |
| O1—S1—C2    | 104.2(5)        | H4B—C4—H4C  | 109.500         |
| C1—S1—C2    | 95.3(7)         | H5A—C5—H5B  | 109.500         |
| C5—S2—C3    | 101.9(5)        | H5A—C5—H5C  | 109.500         |
| C4—S2—C5    | 103.8(5)        | H5B—C5—H5C  | 109.500         |

|               |          |             |         |
|---------------|----------|-------------|---------|
| C4—S2—C3      | 101.1(6) | H6A—C6—H6B  | 109.500 |
| H6A—C6—H6C    | 109.500  | S2—C4—H4A   | 109.500 |
| H6B—C6—H6C    | 109.500  | S2—C4—H4B   | 109.500 |
| H7A—C7—H7B    | 109.500  | S2—C4—H4C   | 109.500 |
| H7A—C7—H7C    | 109.500  | S2—C5—H5A   | 109.500 |
| H7B—C7—H7C    | 109.500  | S2—C5—H5B   | 109.500 |
| H8A—C8—H8B    | 109.500  | S2—C5—H5C   | 109.500 |
| H8A—C8—H8C    | 109.500  | S3—C6—H6A   | 109.500 |
| H8B—C8—H8C    | 109.500  | S3—C6—H6B   | 109.500 |
| H9A—C9—H9B    | 109.500  | S3—C6—H6C   | 109.500 |
| H9A—C9—H9C    | 109.500  | S4—C7—H7A   | 109.500 |
| H9B—C9—H9C    | 109.500  | S4—C7—H7B   | 109.500 |
| H10A—C10—H10B | 109.500  | S4—C7—H7C   | 109.500 |
| H10A—C10—H10C | 109.500  | S4—C8—H8A   | 109.500 |
| H10B—C10—H10C | 109.500  | S4—C8—H8B   | 109.500 |
| H11A—C11—H11B | 109.500  | S4—C8—H8C   | 109.500 |
| H11A—C11—H11C | 109.500  | S3—C9—H9A   | 109.500 |
| H11B—C11—H11C | 109.500  | S3—C9—H9B   | 109.500 |
| S1—C1—H1A     | 109.500  | S3—C9—H9C   | 109.500 |
| S1—C1—H1B     | 109.500  | S4—C10—H10A | 109.500 |
| S1—C1—H1C     | 109.500  | S4—C10—H10B | 109.500 |
| S1—C2—H2A     | 109.500  | S4—C10—H10C | 109.500 |
| S1—C2—H2B     | 109.500  | S3—C11—H11A | 109.500 |
| S1—C2—H2C     | 109.500  | S3—C11—H11B | 109.500 |
| S2—C3—H3A     | 109.500  | S3—C11—H11C | 109.500 |
| S2—C3—H3B     | 109.500  |             |         |
| S2—C3—H3C     | 109.500  |             |         |

**Table S5:** Modes of vibration present in (TMS)<sub>2</sub>BiBr<sub>5</sub>.DMSO compound

| Modes of Vibration                                     | Raman Shifts (cm <sup>-1</sup> )<br>Reported in literature<br>(Reference 1) | Observed Raman modes<br>of (TMS) <sub>2</sub> BiBr <sub>5</sub> .DMSO<br>compound (cm <sup>-1</sup> ) |
|--------------------------------------------------------|-----------------------------------------------------------------------------|-------------------------------------------------------------------------------------------------------|
| Br—Bi—Br                                               | 67                                                                          | 69.8                                                                                                  |
| Bi—Br stretching vibration                             | 158                                                                         | 154.2                                                                                                 |
| Bi—Br stretching vibration                             | 172                                                                         | 175.1                                                                                                 |
| SC <sub>3</sub> deformation                            | 290                                                                         | 284.4                                                                                                 |
| SC <sub>3</sub> deformation                            | 311                                                                         | 314.4                                                                                                 |
| SC <sub>3</sub> symmetric stretching (A <sub>1</sub> ) | 653                                                                         | 656.2                                                                                                 |
| SC <sub>3</sub> symmetric stretching (A <sub>1</sub> ) | 690                                                                         | 683.9                                                                                                 |
| SC <sub>3</sub> asymmetric stretching (E)              | 727                                                                         | 731.5                                                                                                 |
| CH <sub>3</sub> symmetric deformation                  | 1056                                                                        | 1050                                                                                                  |
| CH <sub>3</sub> asymmetric deformation                 | 1425                                                                        | 1422                                                                                                  |
| CH <sub>3</sub> symmetric stretching.                  | 2919                                                                        | 2921                                                                                                  |
| CH <sub>3</sub> asymmetric stretching.                 | 3010                                                                        | 3010                                                                                                  |

1. J. W. Ypenburg, E. van Der Leij-Van Wirdum and H. Gerding, Recl. des Trav. Chim. des Pays-Bas, 1971, 90, 896–900

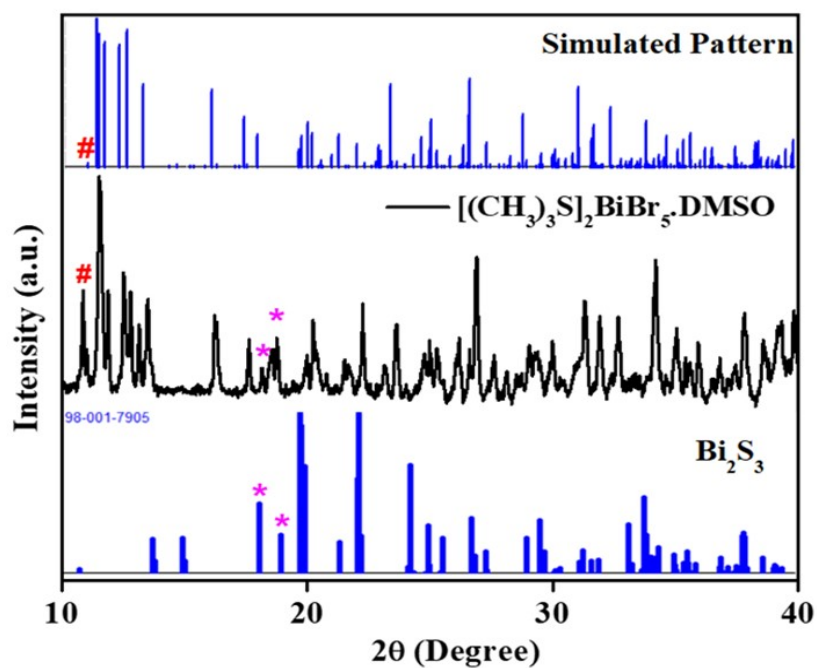

**Figure S1.** PXRD pattern of  $[(\text{CH}_3)_3\text{S}]_2\text{BiBr}_5 \cdot \text{DMSO}$  (black). The upper blue PXRD shows the simulated pattern obtained from the single crystal data and the lower one shows the  $\text{Bi}_2\text{S}_3$  reference pattern.

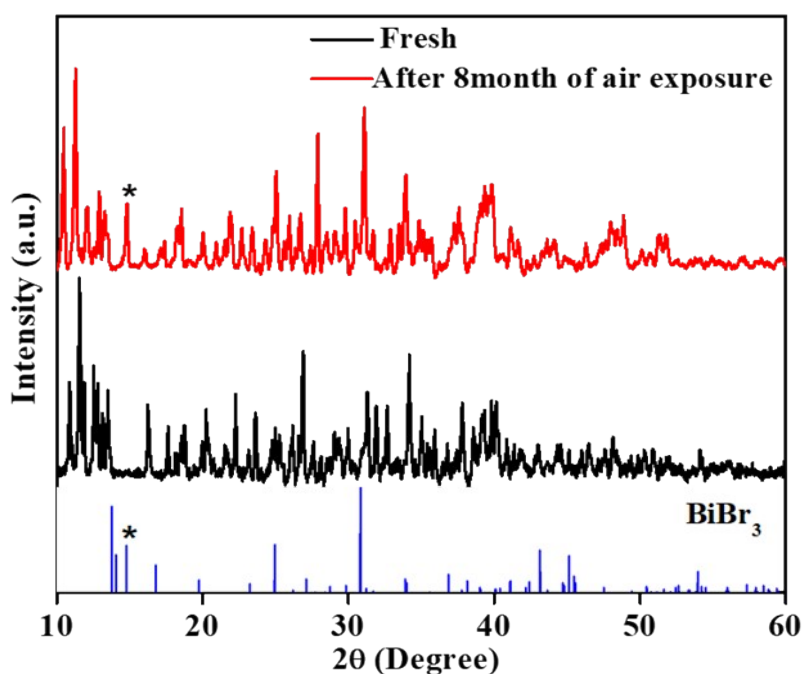

**Figure S2.** PXRD pattern of fresh  $[(\text{CH}_3)_3\text{S}]_2\text{BiBr}_5 \cdot \text{DMSO}$  (black) and after eight months of air exposure. The lower blue PXRD shows the  $\text{BiBr}_3$  reference pattern.



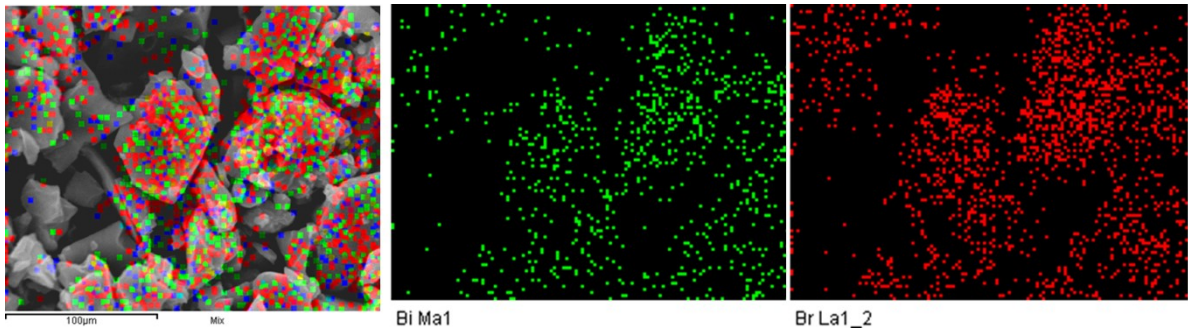

**Figure S3:** Elemental mapping of  $(\text{TMS})_2\text{BiBr}_5 \cdot \text{DMSO}$ .
